# Supplementary material for: Role of Innate Immune and Inflammatory Signaling in West Nile Virus Tropism and Neuronal and Glial Cell Death
Source: Research Square preprint supplement (doi:10.21203/rs.3.rs-7472555/v1), 2025-09-11
Supplement: Supplementary file 1 [file 54202c1d49a4d61ca3fdac1d.docx]

**Supplemental figure 1.**


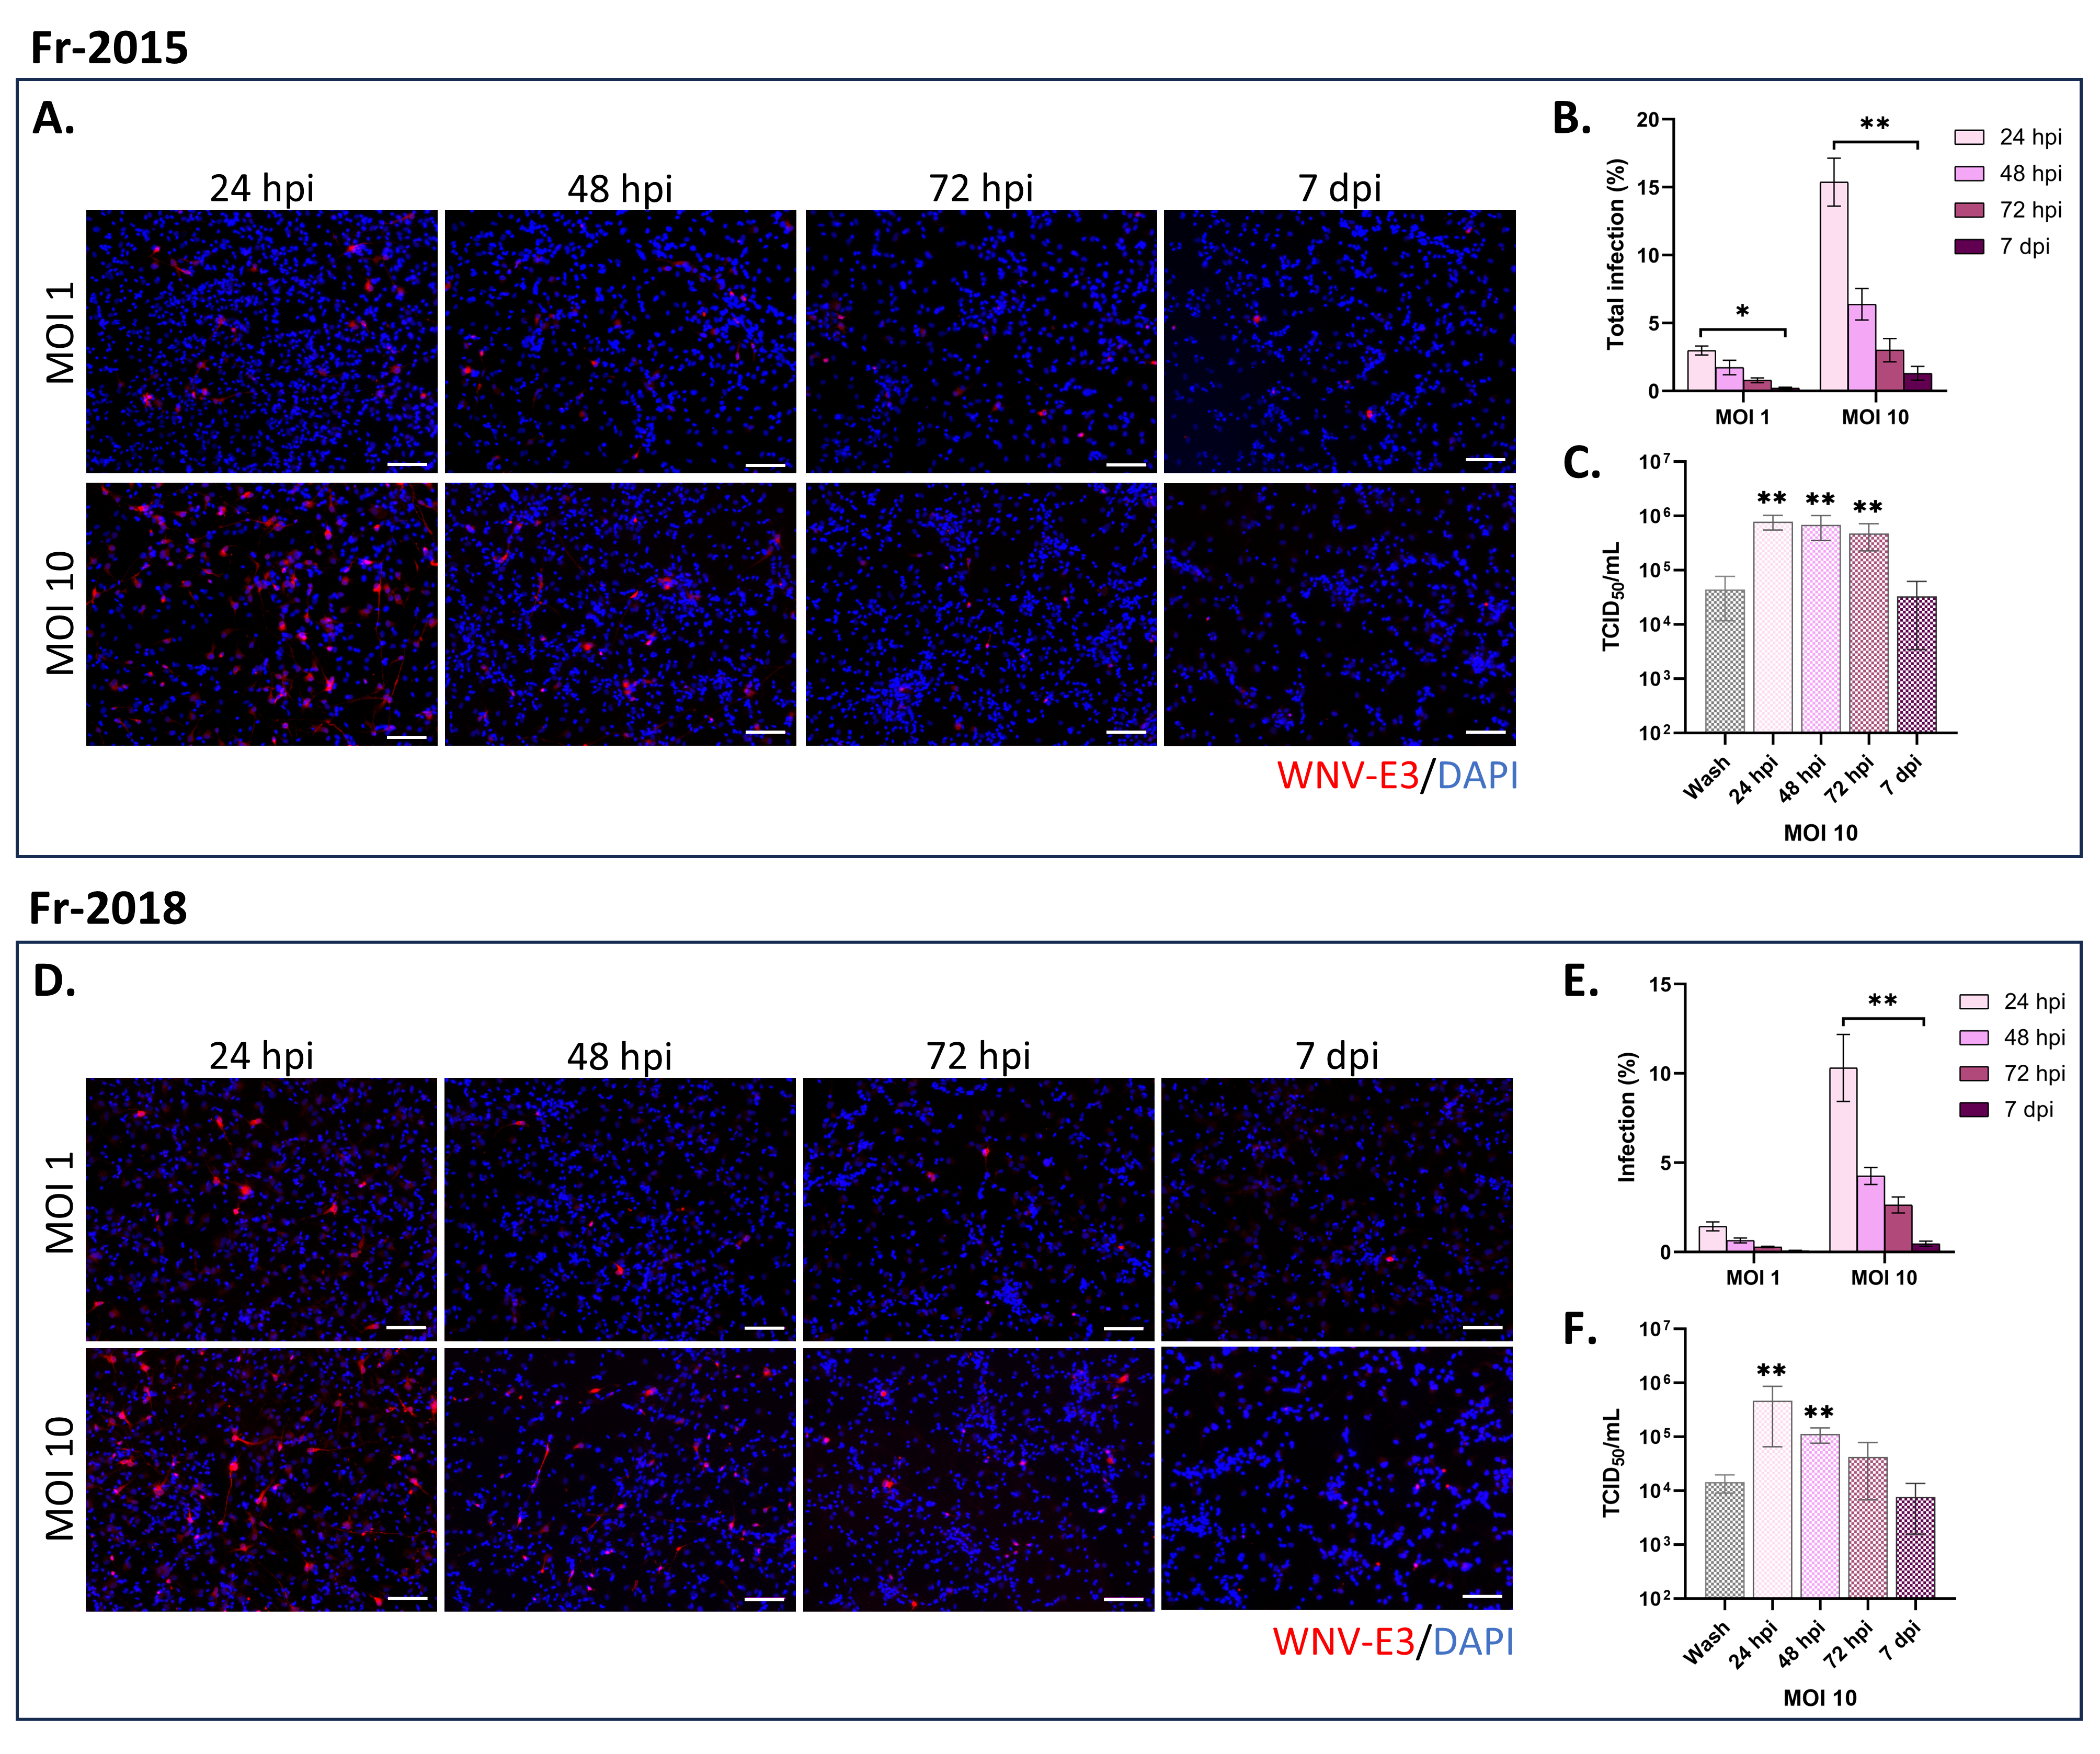


**Permissivity of neuronal/glial cells derived from human neural progenitors to WNVFr2015 and WNVFr2018**. (A, D) Immunofluorescence labeling with an antibody against WNV-E3 (red) of hNGC infected for 24, 48, 72 hours or 7 days with WNVFr2015 (A) or WNVFr2018 (D) at MOI 1 or 10. Nuclei are stained with DAPI (blue). Scale bars = 100 µm. (B, E) Automatic enumeration of cells infected with WNVFr2015 (B) or WNVFr2018 (E) based on immunofluorescence staining using an OPERA-Phenix™ Plus instrument. (C, F) Supernatant of hNGC infected with WNVFr2015 (C) or WNVFr2018 (F) at MOI 10 were titrated by endpoint dilution (TCID50) at the indicated time points. Results are representative of three independent experiments performed in six replicates (B, E) or pooled from two independent experiments performed in duplicate or triplicate (C, F). Data are expressed as the mean ± SD. Statistical analysis was performed using a Kruskal-Wallis test with post-hoc Dunn’s test (B, E) or two-tailed unpaired Mann-Whitney tests between the wash and other timepoints (C, F) with GraphPad Prism V10.0.0. *p < 0.05; **p < 0.01.

**Supplemental figure 2.**

**WNVFr2015 and WNVFr2018 tropism in hNGC and cortical neurons derived from hiPSC.**  (A-F) Human NGC were infected with WNVFr2015 (upper panel) or WNVFr2018 (middle panel) at MOI 10 for 24 hours. (A, D) Immunofluorescence labeling of infected cells. Antibodies against βIII-tubulin (neurons), GFAP (astrocytes) or OLIG2 (oligodendrocytes) (green) and WNV-E3 (red) were used. Arrowheads show infected astrocytes and oligodendrocytes. Scale bars = 20 µm. (B, C, E, F) Automatic enumeration of infected astrocytes (B, E) or oligodendrocytes (C, F) at 24, 48, 72 hpi and 7 dpi, based on immunofluorescence staining using an OPERA-Phenix™ Plus instrument. (G) hiPSC-derived cortical neurons were infected with WNVFr2015 and WNVFr2018 for 24 hours. Immunofluorescence labeling using antibodies against βIII-tubulin (green) and WNV-E3 (red). Scale bars = 50 µm. (A, D, G) Note that βIII-tubulin positive cells were not infected. Nuclei were stained with DAPI (blue). Results are representative of three independent experiments performed in at least 5 replicates. Data are expressed as mean ± SD. Statistical analysis was performed using a Kruskal-Wallis test with post-hoc Dunn’s test with GraphPad Prism V10.0.0. **p < 0.01; ***p < 0.001; ****p < 0.0001.


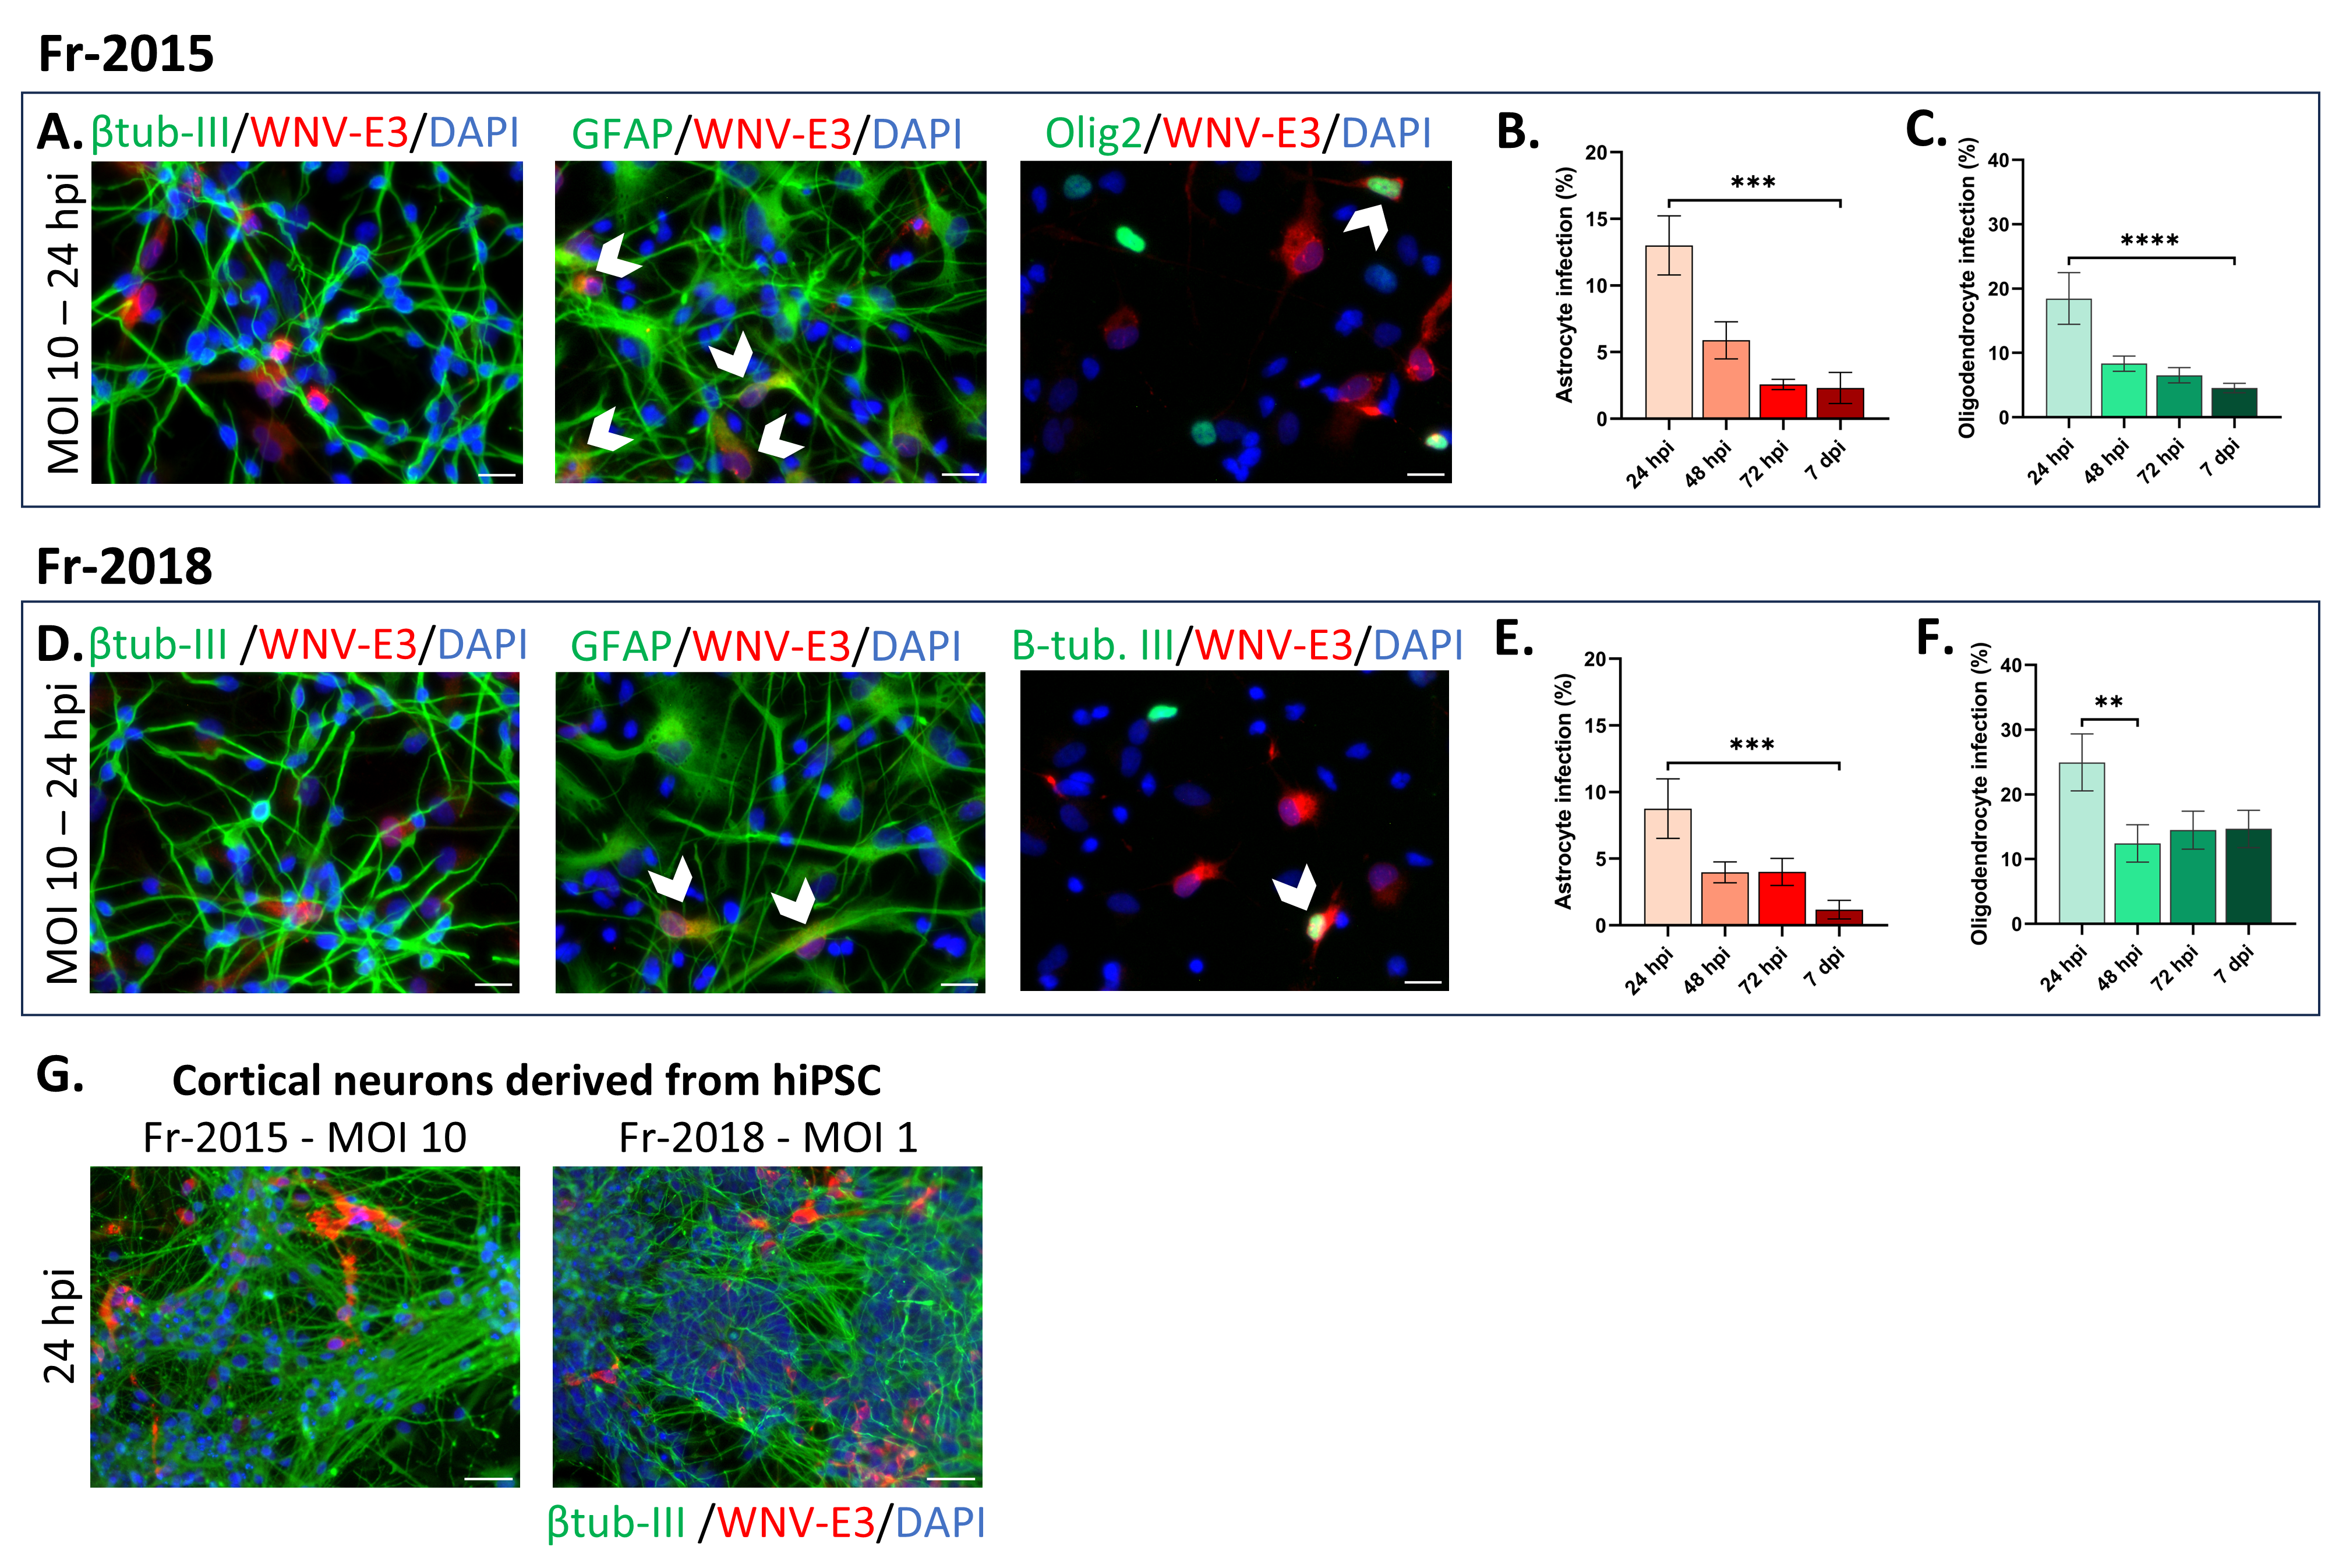


**Supplemental figure 3.**


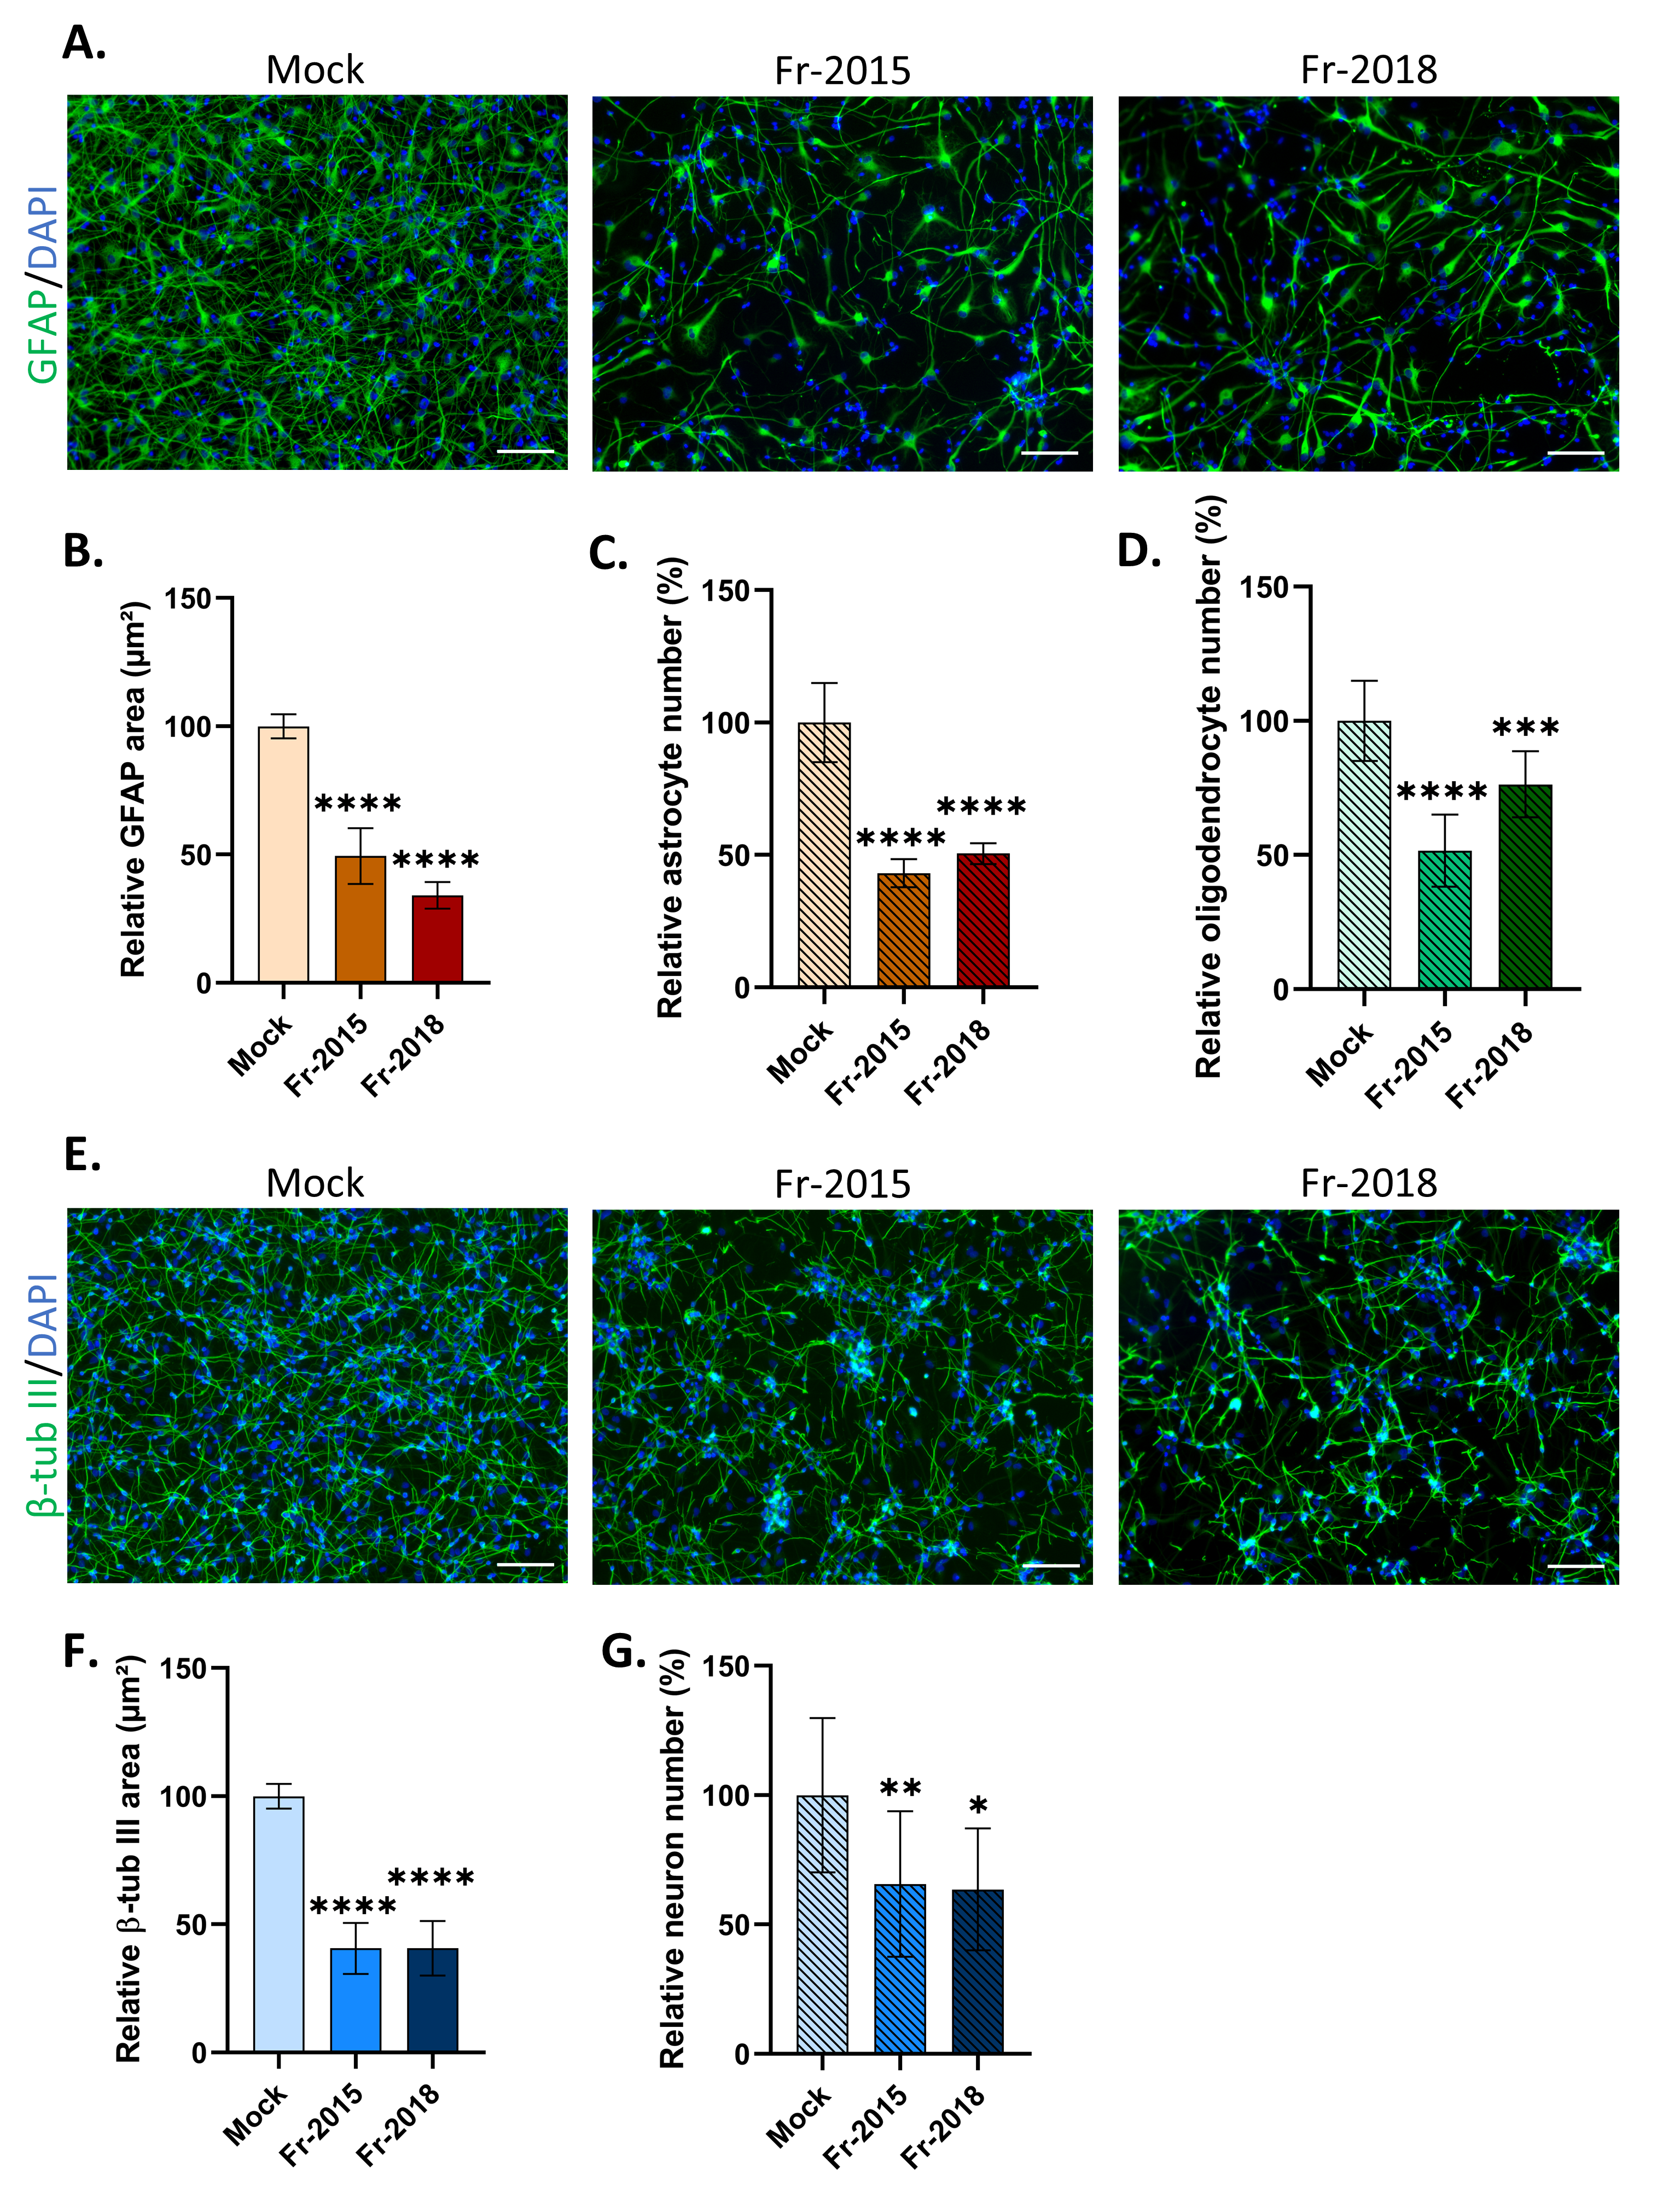


**Cell damage induced by WNVFr2015 and WNVFr2018 in hNGC.** Human NGC were infected with WNVFr2015 or WNVFr2018 at MOI 10 for 7 days. (A, E) Immunofluorescence labeling using antibodies against GFAP (astrocytes) (A) or βIII-tubulin (neurons) (E) in green. Nuclei were stained with DAPI (blue). Scale bars = 100 µm. (B, F) Automatic quantification of area occupied by astrocytes (B) and neurons (F) (cell bodies and processes), based on immunofluorescence staining using an ImageXpress micro instrument. (C) Automatic enumeration of astrocytes, based on nuclei characteristics, using an OPERA Phenix Plus instrument. (D, G) Automatic enumeration of Olig2-positive (oligodendrocytes) (D) and HuC/D-positive (neurons) (G) cells, using an ImageXpress micro instrument. The results are expressed as the mean ± SD and are representative of three independent experiments performed in 6 replicates (C) or are from a single experiment performed in 6 replicates (WNVFr2018) or pooled from two independent experiments performed in 6 replicates (WNVFr2015) (B, D, F, G). Results are normalized relative to mock cells. Statistical analysis was performed using a two-tailed unpaired t test with Graphpad Prism V10.0.0. ***p < 0.001; ****p < 0.0001.

**Supplemental table 1. List of cytokines tested in the Proteome Profiler Human Cytokine Array (R&D Sciences) and their coordinates on the blot.** Lines are named A to E, from top to bottom of the blot. Dots are numbered 1 to 20, from left to right.

| Coordinates | Gene name |
| --- | --- |
| A1, A2 | **Reference Spots** |
| A3, A4 | **CCL1/I-309** |
| A5, A6 | **CCL2/MCP-1** |
| A7, A8 | **MIP-1α/MIP-1β** |
| A9, A10 | **CCL5/RANTES** |
| A11, A12 | **CD40 Ligand/TNFSF5** |
| A13, A14 | **Complement Component C5/C5a** |
| A15, A16 | **CXCL1/GROα** |
| A17, A18 | **CXCL10/IP-10** |
| A19, A20 | **Reference Spots** |
| B3, B4 | **CXCL11/I-TAC** |
| B5, B6 | **CXCL12/SDF-1** |
| B7, B8 | **G-CSF** |
| B9, B10 | **GM-CSF** |
| B11, B12 | **ICAM-1/CD54** |
| B13, B14 | **IFN-γ** |
| B15, B16 | **IL-1α/IL-1F1** |
| B17, B18 | **IL-1β/IL-1F2** |
| C3, C4 | **IL-1ra/IL-1F3** |
| C5, C6 | **IL-2** |
| C7, C8 | **IL-4** |
| C9, C10 | **IL-5** |
| C11, C12 | **IL-6** |
| C13, C14 | **IL-8** |
| C15, C16 | **IL-10** |
| C17, C18 | **IL-12 p70** |
| D3, D4 | **IL-13** |
| D5, D6 | **IL-16** |
| D7, D8 | **IL-17A** |
| D9, D10 | **IL-17E** |
| D11, D12 | **IL-18/IL-1F4** |
| D13, D14 | **IL-21** |
| D15, D16 | **IL-27** |
| D17, D18 | **IL-32α** |
| E1, E2 | **Reference Spots** |
| E3, E4 | **MIF** |
| E5, E6 | **Serpin E1/PAI-1** |
| E7, E8 | **TNF-α** |
| E9, E10 | **TREM-1** |
| E19, E20 | **Negative Control** |

**Supplemental table 2.** Primer pairs used for RT-qPCR analyses.

| Gene name | Forward primer | Reverse primer |
| --- | --- | --- |
| CXCL10 | GCAGGTACAGCGTACGGTTC | CAGCAGAGGAACCTCCAGTC |
| GAPDH | CACCATCTTCCAGGAGCGAG | GAGATGATGACCCTTTTGGC |
| HPRT1 | GGACTAATTATGGACAGGACT | GCTCTTCAGTCTGATAAAATCTAC |
| IFI6 | TCGCTGATGAGCTGGTCTGC | ATTACCTATGACGACGCTGC |
| IL-6 | FCCTTCTCCACAAGCGCCTTC | AAGGCAGCAGGCAACACCA |
| MDA5 | TGCCCATGTTGCTGTTATGT | GTCTGGGGCATGGAGAATAA |
| OAS2 | TGTTTTCCGTCCATAGGAGC | CTGATCGACGAGATGGTGAA |
| TNFα | AGATGATCTGACTGCCTGGG | TGCTTGTTCCTCAGCCTCTT |
| TRAIL | AGCAATGCCACTTTTGGAGT | TTCACAGTGCTCCTGCAGTC |
| WNV | CCTGTGTGAGCTGACAAACTTAGT | GCGTTTTAGCATATTGACAGCC |
